# Supplementary material for: Potential modulation of Indian Ocean basin mode on the interdecadal variations of summer precipitation over the East Asian monsoon boundary zone
Source: Copernicus journal article supplement (doi:10.5194/egusphere-2023-1529), 2023-09-19
Supplement: Supplementary file 1 [file egusphere-2023-1529-supplement.pdf]

1  
2  
3  
4  
5  
6  
7  
8  
9  
10  
11  
12  
13  
14  
15  
16  
17  
18  
19  
20  
21  
22  
23  
24  
25  
26  
27  
28  
29  
30  
31  
32  
33  
34  
35  
36  
37  
38  
39  
40  
41  
42  
43

*Supplement of*

**Potential modulation of Indian Ocean basin mode on the interdecadal variations of summer precipitation over the East Asian monsoon boundary zone**

**Jing Wang et al.**

Correspondence: Yanju Liu (liuyan@cmac.gov.cn)

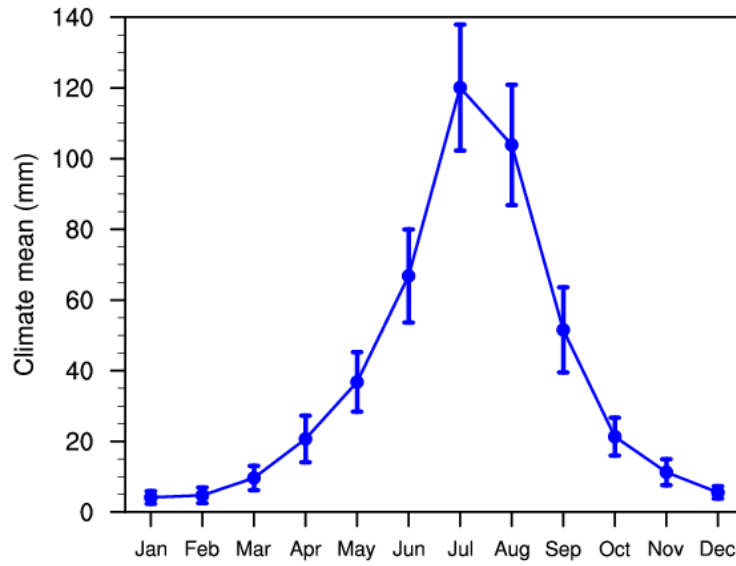

44  
 45  
 46  
 47  
 48  
 49  
 50  
 51  
 52  
 53  
 54  
 55  
 56  
 57  
 58  
 59  
 60  
 61  
 62  
 63  
 64  
 65  
 66  
 67  
 68  
 69  
 70

**Figure S1.** Annual cycle of the climatological-mean (1901–2014) EAMBZ precipitation (mm). The error bars denote one standard deviation from the mean. The precipitation is derived from the CRU TS3.26 precipitation data.

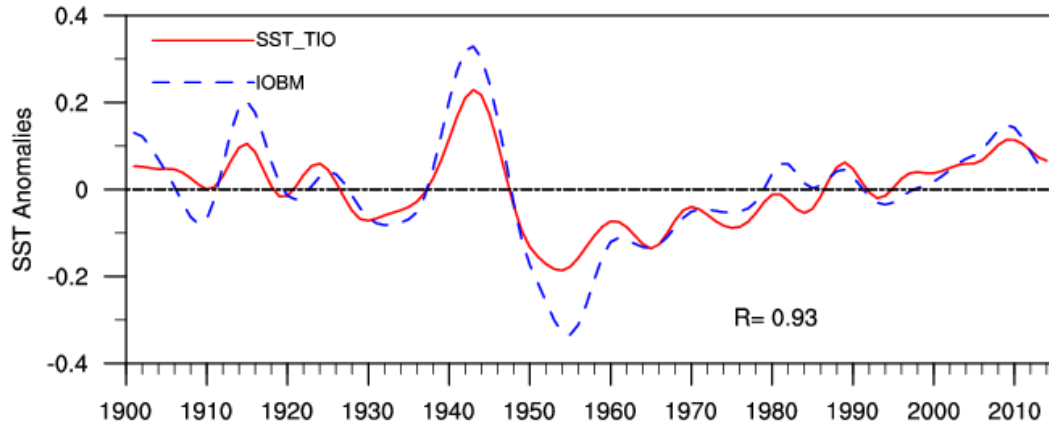

71  
72  
73  
74  
75  
76  
77  
78  
79  
80  
81  
82  
83  
84  
85  
86  
87  
88  
89  
90  
91  
92  
93  
94  
95

**Figure S2.** Time-evolving observed summertime SSTAs over the narrower TIO domain for defining  $I_{IOBM}$  (20°S–20°N, 40°E–100°E; blue line) and SSTAs over the broader TIO domain in CESM1\_IOPES (15°S–15°N, 40°E–174°E; red line) from 1901–2014. The time series are detrended and 11-year low-pass filtered. The numeral at the bottom represents the TCC between the corresponding time series. The base period for calculating SSTAs is 1901–2014. The areal mean SSTAs are calculated based on the ERSSTv5.

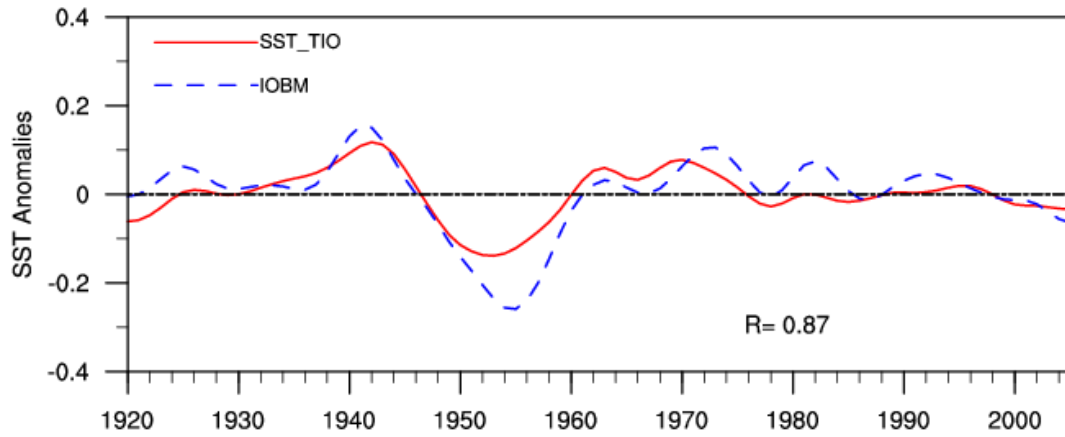

96

97 **Figure S3.** Time-evolving simulated summertime SSTAs over the narrower TIO domain for defining  $I_{IOBM}$  (20°S–  
 98 20°N, 40°E–100°E; blue line) and SSTAs over the broader TIO domain in CESM1\_IOPES (15°S–15°N, 40°E–174°E;  
 99 red line) from 1920–2005. The time series are detrended and 11-year low-pass filtered. The numeral at the bottom  
 100 represents the TCC between the corresponding time series. The areal mean SSTAs are calculated based on the  
 101 difference between the CESM1\_IOPES ensemble mean and the CESM1\_LENS ensemble mean (former minus  
 102 latter).

103

104

105

106

107

108

109

110

111

112

113

114

115

116

117

118

119

120

121

122

123

124

125

126

127

128

129

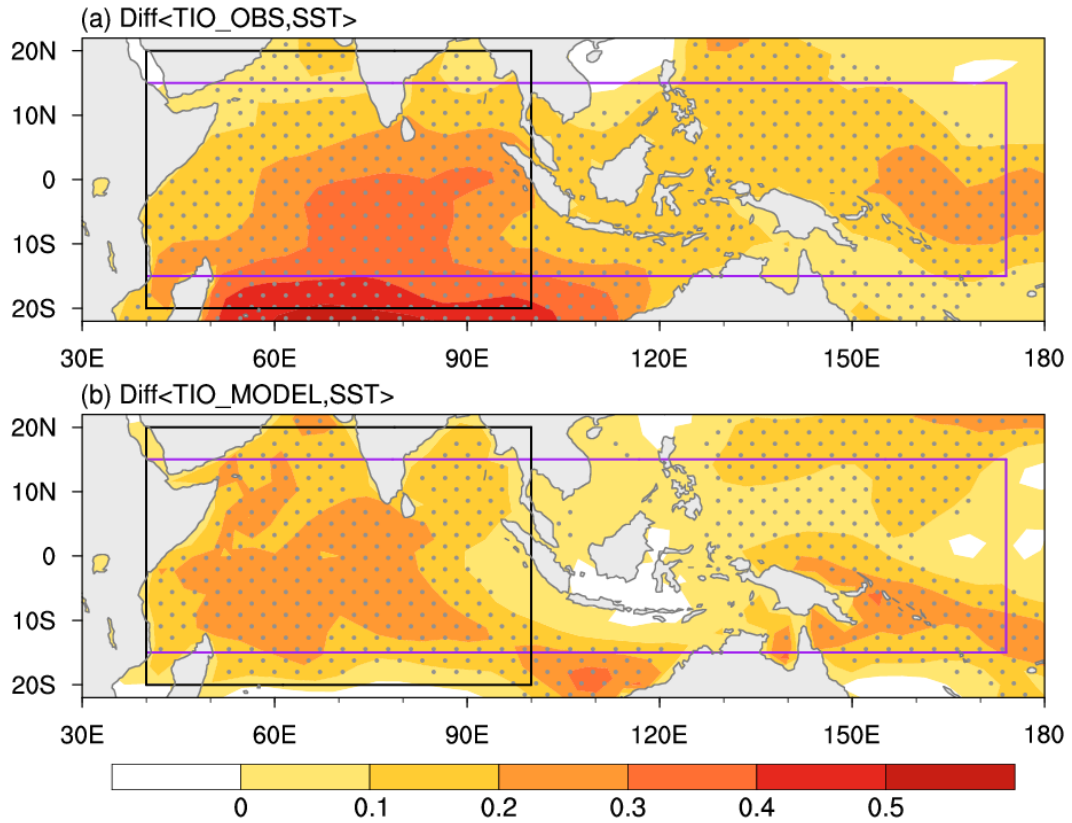

130

131 **Figure S4.** Composite differences of (a) observed and (b) simulated JJA-mean SST ( $^{\circ}\text{C}$ ) between warm and cold  
 132 SST years over the broader TIO domain in CESM1\_IOPES ( $15^{\circ}\text{S}$ – $15^{\circ}\text{N}$ ,  $40^{\circ}$ – $174^{\circ}\text{E}$ ; purple box). In panel (a), the  
 133 warm and cold TIO SST years are selected based on the  $\pm 0.5$  standard deviations of the observed time-evolving  
 134 SSTAs during 1901–2014, as shown in Fig. S2 (red line). In panel (b), the warm and cold TIO SST years are  
 135 selected based on the  $\pm 0.5$  standard deviations of the simulated time-evolving SSTAs during 1920–2005, as shown  
 136 in Fig. S3 (red line). The black frame ( $20^{\circ}\text{S}$ – $20^{\circ}\text{N}$ ,  $40^{\circ}$ – $100^{\circ}\text{E}$ ) outlines the domain for delineating the IOBM  
 137 mode (the same hereinafter). All variables are detrended and 11-year low-pass filtered. Areas with significant  
 138 values exceeding the 95% confidence level are dotted. The observed SSTAs are derived from the ERSSTv5; whilst  
 139 the simulated SSTAs are calculated based on the difference between the CESM1\_IOPES ensemble mean and the  
 140 CESM1\_LENS ensemble mean (former minus latter), highlighting the internally driven impacts of TIO SSTAs.

141

142

143

144

145

146

147

148

149

150

151

152

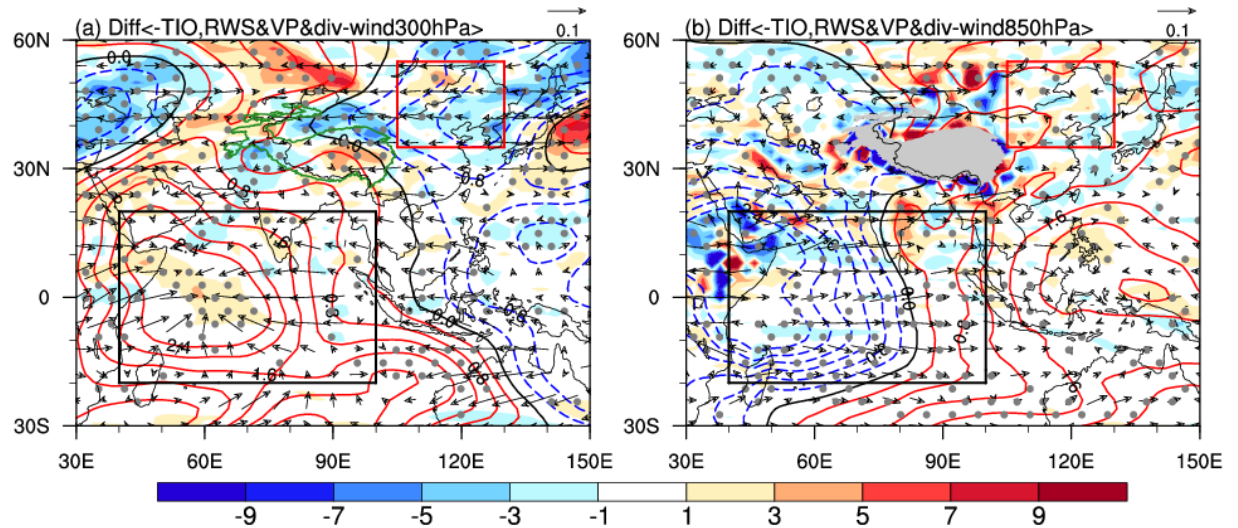

153

154 **Figure S5.** Simulated composite differences of JJA-mean (a) 300- and (b) 850-hPa RWS (shading;  $10^{-11} \text{ s}^{-2}$ ),  
 155 velocity potential (contours; interval: 0.8;  $10^5 \text{ m}^2 \text{ s}^{-1}$ ), and divergent horizontal wind (vectors;  $\text{m s}^{-1}$ ) between cold  
 156 and warm SST years over the broader TIO domain in CESM1\_IOPES ( $15^\circ\text{S}$ – $15^\circ\text{N}$ ,  $40^\circ$ – $174^\circ\text{E}$ ; purple box in Fig.  
 157 S4). The warm and cold TIO SST years are selected based on the  $\pm 0.5$  standard deviations of the simulated  
 158 time-evolving SSTAs during 1920–2005, as shown in Fig. S3 (red line). All variables are detrended and 11-year  
 159 low-pass filtered. Areas with significant values of RWS exceeding the 95% confidence level are stippled. Only  
 160 vectors that are significant at the 95% confidence level are shown. The simulated anomalies of RWS, velocity  
 161 potential, and divergent horizontal wind are calculated based on the difference between the CESM1\_IOPES  
 162 ensemble mean and the CESM1\_LENS ensemble mean (former minus latter), highlighting the internally driven  
 163 impacts of TIO SSTAs.

164

165

166

167

168

169
