# Supplementary material for: Potential modulation of Indian Ocean basin mode on the interdecadal variations of summer precipitation over the East Asian monsoon boundary zone
Source: Copernicus journal article supplement (doi:10.5194/egusphere-2023-1529), 2023-09-19

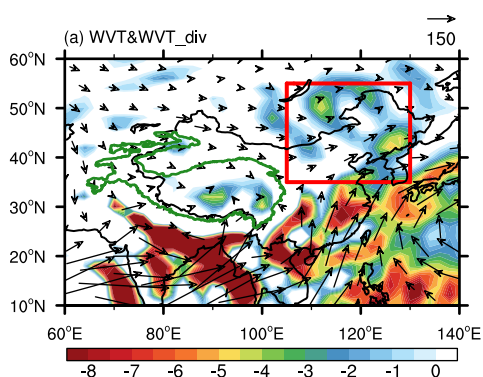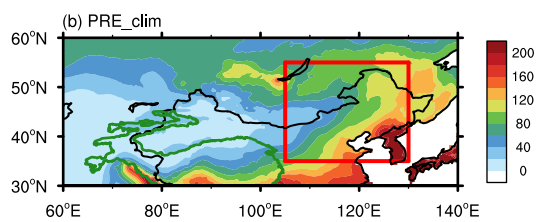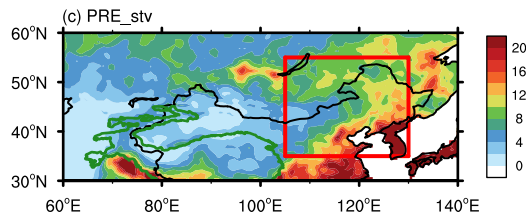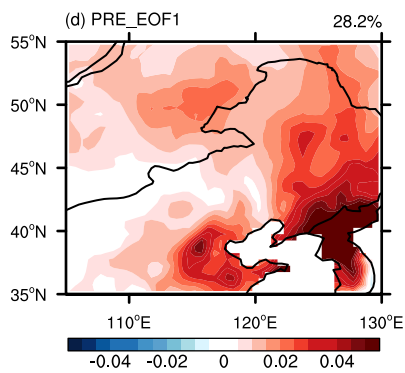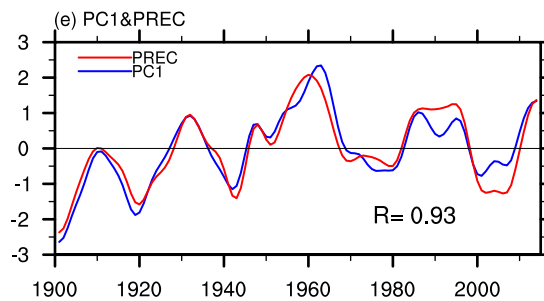

Supplement: Supplementary file [file egusphere-2023-1529-AC2-supplement.zip]
